1 **Fluctuations in populations of subsurface methane oxidizers in coordination with**  
2 **changes in electron acceptor availability**

3 C. Magnabosco<sup>1\*</sup>, P.H.A. Timmers<sup>2</sup>, M.C.Y. Lau<sup>3</sup>, G. Borgonie<sup>4</sup>, B. Linage-Alvarez<sup>5</sup>, O.  
4 Kuloyo<sup>5,6</sup>, R. Alleva<sup>7</sup>, T.L. Kieft<sup>8</sup>, G.F. Slater<sup>9</sup>, E. van Heerden<sup>5,10</sup>, B. Sherwood Lollar<sup>11</sup>,  
5 T.C. Onstott<sup>3</sup>

6  
7 <sup>1</sup>Flatiron Institute Center for Computational Biology, Simons Foundation, New York USA

8 <sup>2</sup>Department of Microbial Physiology, Laboratory of Microbiology, Wageningen University, Wageningen  
9 Netherlands

10 <sup>3</sup>Department of Geosciences, Princeton University, Princeton USA

11 <sup>4</sup>Extreme Life Isyensya, Gentbrugge Belgium

12 <sup>5</sup> Department of Microbial, Biochemical and Food Biotechnology, University of the Free State  
13 Bloemfontein, South Africa

14 <sup>6</sup>Department of Geoscience, University of Calgary, Calgary Canada

15 <sup>7</sup>Department of Ecology and Evolutionary Biology, Princeton University, Princeton USA

16 <sup>8</sup>Department of Biology, New Mexico Institute of Mining and Technology, Socorro USA

17 <sup>9</sup>School of Geography and Earth Sciences, McMaster University, Hamilton Canada

18 <sup>10</sup>Biosaense Solutions, Bloemfontein, South Africa

19 <sup>11</sup>Department of Earth Sciences, University of Toronto, Toronto Canada

20 \*To whom correspondence should be addressed: Cara Magnabosco; 162 Fifth Ave, New York, NY 10012  
21 [cmagnabosco@flatironinstitute.org](mailto:cmagnabosco@flatironinstitute.org); +1 646-603-3683

22  
23  
24 **Running Title:** Subsurface ANME in South Africa

25  
26 **Abstract:**

27 The concentrations of electron donors and acceptors in the terrestrial subsurface  
28 biosphere fluctuate due to migration and mixing of subsurface fluids, but the mechanisms  
29 and rates at which microbial communities respond to these changes are largely unknown.  
30 Subsurface microbial communities exhibit long cellular turnover times and are often  
31 considered relatively static—generating just enough ATP for cellular maintenance. Here,  
32 we investigated how subsurface populations of CH<sub>4</sub> oxidizers respond to changes in  
33 electron acceptor availability by monitoring the biological and geochemical composition  
34 in a 1,339 meters-below-land-surface (mbls) fluid-filled fracture over the course of both  
35 longer (2.5 year) and shorter (2-week) time scales. Using a combination of metagenomic,  
36 metatranscriptomic, and metaproteomic analyses, we observe that the CH<sub>4</sub> oxidizers  
37 within the subsurface microbial community change in coordination with electron acceptor  
38 availability over time. We then validate these findings through a series of <sup>13</sup>C-CH<sub>4</sub>  
39 laboratory incubation experiments, highlighting a connection between composition of  
40 subsurface CH<sub>4</sub> oxidizing communities and electron acceptor availability.

41  
42 **Introduction:**

43 The terrestrial subsurface is an energy-limited environment that is subject to  
44 changes in fluid chemistry over time (Onstott *et al.* 2006). Laboratory experiments have  
45 shown that when native fluids are supplemented with electron acceptors such as SO<sub>4</sub><sup>2-</sup>,  
46 the activity of subsurface communities can be enhanced (Rajala *et al.* 2015). Large  
47 disturbances such as CO<sub>2</sub> (Morozova *et al.* 2010, 2011) and H<sub>2</sub> injection (Bagnoud *et al.*  
48 2016), hydraulic fracking (Daly *et al.* 2016), and drilling (Purkamo *et al.* 2013) have also

49 been reported to alter natural subsurface communities. The response of microbial  
50 communities to natural fluctuations in their environment, however, is less understood.

51 In the South African subsurface, increases in the availability of electron acceptors  
52 such as  $\text{NO}_3^-$  (>10-fold higher) and  $\text{SO}_4^{2-}$  (>5-fold higher) over a 1.5 year period did not  
53 correspond to changes in the bacterial community (Magnabosco *et al.* 2014; Simkus *et al.*  
54 2015). However, 16S SSU rRNA gene amplicon surveys of the archaeal communities  
55 from the same site and sampling points of the aforementioned studies showed a diverse  
56 collection of anaerobic methane oxidizing archaea (ANME) (Young *et al.* 2017) and  
57 methane oxidizing bacteria (Simkus *et al.* 2015).

58 ANME-1 and “*Candidatus Methanoperedens nitroreducens*”, a member of  
59 ANME-2d, are among the best described ANME and couple the oxidation of  $\text{CH}_4$  with  
60  $\text{SO}_4^{2-}$  and  $\text{NO}_3^-$  reduction, respectively (Haroon *et al.* 2013; Wegener *et al.* 2015). Other  
61 ANME-2d have also been reported to couple  $\text{CH}_4$  oxidation to the reduction of  $\text{Mn}^{4+}$   
62 and/or  $\text{Fe}^{3+}$  (Ettwig *et al.* 2016). With the exception of “*Ca. Methyloirabilis oxyfera*”  
63 which has been suggested to generate intracellular  $\text{O}_2$  for  $\text{CH}_4$  oxidation from two  
64 molecules of  $\text{NO}$  (Ettwig *et al.* 2010), bacterial methanotrophs couple  $\text{CH}_4$  oxidation with  
65 free  $\text{O}_2$  in the environment. This potential relationship between  $\text{CH}_4$  oxidizers (MOs) and  
66 electron acceptor availability provides a compelling avenue to explore the response of  
67 subsurface communities to natural changes in subsurface fluid chemistry.

68 Our study focuses on the subsurface microbial community of a 1,339 meters-  
69 below-land-surface (mbls) fluid-filled fracture (Be326 Bh2). Here, bulk bacterial  
70 phospholipid-derived fatty acid (PLFA) isotopic signatures have been shown to be  
71 consistent with the accumulation of  $^{13}\text{C}$ -dissolved inorganic carbon (DIC) impacted by  
72 the microbial oxidation of  $\text{CH}_4$  (Simkus *et al.* 2015) but the organisms responsible for  
73  $\text{CH}_4$  oxidation have not been well characterized (Magnabosco *et al.* 2014; Simkus *et al.*  
74 2015; Young *et al.* 2017). To better describe the membership of native MO communities,  
75 their methane oxidizing genes, and their response to changes in fluid chemistry over time,  
76 we combined metagenomics, metatranscriptomics, and metaproteomics analyses with  
77 geochemical monitoring of Be326 Bh2’s *in situ* fracture fluids over both 2.5 year and 2  
78 week timescales. We also performed activity assays on the fracture fluids using  $^{13}\text{C}$ -  
79 labeled  $\text{CH}_4$  together with different electron acceptors to track anaerobic methane  
80 oxidizing activity in both short- and long-term incubations.

81

## 82 **Materials and Methods:**

83 Be326 Bh2 was accessed through a 57-m, horizontally drilled borehole that was  
84 drilled in 2007 and sealed with a high-pressure steel valve. The borehole is located on the  
85 26 level of shaft 3 in the Beatrix Gold Mine (28.232288 S, 26.794365 E; Welkom, South  
86 Africa). Annual samples were collected during field trips in 2011, 2012, and 2013 and  
87 weekly samples were collected during the 2013 field trip with three time points  
88 designated as  $T_0$ ,  $T_1$ , and  $T_2$  with  $T_0$  corresponding to the first day of the 2013 study and  
89  $T_2$  corresponding to the last day of the 2013 study.

## 90 **Sampling**

91 Sampling procedures have been outlined previously (Magnabosco *et al.* 2014). To  
92 sample, a sterile (combusted and autoclaved) stainless steel manifold with attached valves  
93 was attached to the Be326 borehole. A high-pressure steel valve was opened, allowing  
94 water to flow freely at  $\sim 4\text{-}6 \text{ L min}^{-1}$  for at least 10 minutes. This manifold allows for the

95 attachment of airtight Teflon tubing and filters for sampling and chemical analysis. For  
96 the 2011, 2012, and 2013 samples, pre-autoclaved 0.1- $\mu\text{m}$  Memtrex NY filters (MNY-91-  
97 1-AAS; General Electric Co., Minnetonka, MN USA) were left on the borehole for 6, 15,  
98 and 14 days, respectively. For the  $T_0$ ,  $T_1$ , and  $T_2$  samples, 0.2- $\mu\text{m}$  Memtrex NY Capsule  
99 (CMNY) filters (General Electric Co., Minnetonka, MN USA) were left on the borehole  
100 for 2 hours with a flow rate of 500 mL per minute (equivalent to approximately 60 L  
101 filtered per time point) in 2013. The total volumes of water filtered for each time point in  
102 the 2.5-year study were 4,875 L, 12,604 L, and 6,635 L in 2011, 2012 and 2013,  
103 respectively.

104 Unfiltered water samples for direct cell counts were collected on the first day of  
105 the 2011, 2012, and 2013 studies and fixed with sterile formaldehyde (final concentration  
106 4% v/v). Cell counts were obtained at the University of the Free State where samples  
107 were filtered through a sterile 0.22 $\mu\text{m}$  Millipore GTTP-type membrane filter, stained  
108 with DAPI, and visualized using fluorescence microscopy.

### 109 ***Geochemical Measurements***

110 Temperature, pH, and  $E_h$  were measured at the borehole using handheld probes  
111 (HANNA instruments, Woonsocket, RI). Gas samples ( $\text{H}_2$ ,  $\text{O}_2$ ,  $\text{CH}_4$ ) were collected and  
112 analyzed by gas chromatography (Peak Performer 1 series, Peak Laboratories, USA)  
113 (Simkus *et al.* 2015). Oxygen was also measured at the borehole using a CHEMET kit  
114 (Chemetrics Inc.; Calverton, VA).  $\text{NO}_3^-$  and  $\text{SO}_4^{2-}$  were measured using an ion  
115 chromatograph coupled to an electrospray ionization-quadrupole mass spectrometer (MS)  
116 (Dionex IC25 and Thermo Scientific MSQ, USA).  $\delta^{18}\text{O}$  and  $\delta^2\text{H}$  were measured as  
117 previously described (Simkus *et al.* 2015).

### 118 ***Preservation of Biomolecules and extraction***

119 Filters were treated with an RNA preserve solution and stored in a  $-80^\circ\text{C}$  freezer.  
120 The RNA preserve is a custom made solution of 20 mM EDTA, 0.3 M sodium citrate,  
121 and 4.3 M ammonium  $\text{SO}_4^{2-}$  (pH 5.2). The solution was autoclaved prior to sample  
122 application. Total protein, together with total DNA and RNA, was extracted using 2X  
123 CTAB lysis buffer and phenol/chloroform (pH=6.5-6.9), and re-suspended in 1 TE-buffer  
124 (Tris-EDTA, pH = 8) and stored in 1.5-mL Eppendorf tubes at  $-20^\circ\text{C}$ . Extraction of  
125 biomolecules is further described elsewhere (Lau *et al.* 2014, 2016).

### 126 ***Amplicon Sequencing and Annotation***

127 The V6 region of archaeal 16S rDNA molecules from the 2011 and 2012 time  
128 points was amplified using 958F (AATTGGANTCAACGCCGG) and 1048R  
129 (CGRCRGCCATGYACCWC) primers. The V4-V5 region of archaeal 16S rDNA  
130 molecules from all time points was amplified using the 517F  
131 (GCCTAAAGCATCCGTAGC; GCCTAAARCGTYCGTAGC;  
132 GTCTAAAGGGTCYGTAGC; GCTTAAAGNGTYCGTAGC;  
133 GTCTAAARCGYYCGTAGC) and 958R (CCGGCGTTGANTCCAATT) primers. For  
134 both amplicon datasets, forward primers included 5-nt multiplexing barcodes and a  
135 reverse 6-nt index. Triplicate PCR amplifications were performed in 33- $\mu\text{L}$  reaction  
136 volumes with an amplification cocktail containing 10.0 U Platinum Taq Hi-Fidelity  
137 Polymerase (Invitrogen, Carlsbad, CA), 1X Hi-Fidelity buffer, 200  $\mu\text{M}$  dNTP PurePeak  
138 DNA polymerase mix (ThermoFisher), 2 mM  $\text{MgSO}_4$  and 0.3  $\mu\text{M}$  of each primer. We  
139 added approximately 10-25 ng template DNA to each PCR and ran a control without  
140 template DNA for each primer pair. Amplification conditions were: initial  $94^\circ\text{C}$ , 3

141 minute denaturation step; 25 cycles of 94°C for 30 s, 60°C for 45 s, and 72°C for 60 s;  
142 and a final 2 minute extension at 72°C. The triplicate PCR reactions were pooled after  
143 amplification and purified using Qiagen MinElute plates followed by clean up, PicoGreen  
144 quantitation and Sage PippinPrep size selection. 101-nt paired-end sequencing was  
145 performed on an Illumina HiSeq 1000 at the Marine Biological Laboratory (Woods Hole,  
146 MA USA). Only reads that were identical in the overlapping regions of the forward and  
147 reverse reads were included for annotation. In the case of V6 data, this filter necessitates  
148 an exact match across both the forward and reverse read. Sequences that met the given  
149 quality criteria were annotated using GAST (Huse *et al.* 2008) and a GAST-formatted  
150 reference set.

### 151 **Mapping of Metatranscriptomic Data to V6 Amplicons**

152 Quality filtered RNA reads were mapped to the GAST-annotated V6 amplicons of  
153 Be326 Bh2 (Magnabosco *et al.* 2014; Young *et al.* 2017) using BLASTn (percent identity  
154 >97%; alignment length > 55 nucleotides (nt)). Reads that mapped positively to V6  
155 sequences were assigned a consensus taxonomy based on the top three BLASTn hits.

### 156 **Generation of Metagenomic and Metatranscriptomic Datasets**

157 DNA samples from 2011 and 2012 were sequenced at the National Center for  
158 Genome Resources (Santa Fe, NM). The 2011 and 2012 metagenomic libraries were  
159 prepared from 500 ng of DNA using the KAPA High Throughput Library Preparation Kit  
160 (KAPA Biosystems), an insert size of approximately 280 bp, and followed by 8 PCR  
161 cycles. Paired-end sequencing (2 × 100 nt) was performed on an Illumina HiSeq 2000.  
162 DNA from 2013 was sequenced at Lewis Sigler Institute for Integrative Genomics  
163 (Princeton, NJ USA) using an Illumina HiSeq 2500. The metagenomic library was  
164 prepared using the TruSeq Rapid SBS Kit, size selected for 380-400 nt, and sequenced  
165 using paired-end sequencing (2 × 215 nt).

166 RNA samples from 2011, 2012, 2013, T<sub>0</sub>, T<sub>1</sub>, and T<sub>2</sub> were sequenced at Lewis  
167 Sigler Institute for Integrative Genomics (Princeton, NJ USA) on an Illumina HiSeq 2500  
168 platform. Here, metatranscriptomic libraries were prepared using the Ovation RNA-Seq  
169 v2 System (NuGEN; San Carlos, CA USA), which involved 15-18 cycles of PCR. The  
170 2011 and 2012 RNA samples were sequenced using 141-nt single-end sequencing while  
171 the 2013, T<sub>0</sub>, T<sub>1</sub>, and T<sub>2</sub> RNA samples were sequenced using 200-nt single-end reads.

### 172 **Targeted Assembly and Tree Building**

173 Reads were quality filtered and assembled using a targeted assembly pipeline  
174 (<https://github.com/cmagnabosco/OmicPipelines>). In summary, this pipeline involved  
175 quality filtering reads using default settings on the fastx toolkit  
176 ([http://hannonlab.cshl.edu/fastx\\_toolkit/](http://hannonlab.cshl.edu/fastx_toolkit/)), targeted assembly of *mcrA* GENES, protein  
177 prediction, alignment of reads to a set of well curated McrA peptides, and the  
178 construction of a phylogenetic tree from the predicted proteins (PhyML (Guindon *et al.*  
179 2010), Best of nearest-neighbor-interchange and subtree-pruning-regrafting, 8 rate  
180 categories, -b 100). This procedure was also repeated for the assembly of *mmo* genes  
181 using a MMO peptide database.

182 Assembled genes of 200 nt or longer were trimmed to include only the coding  
183 region of verified *mcrA* and *mmo* genes. This dataset was used as the reference database  
184 (Supplementary Data 2) to map quality-filtered DNA and RNA reads using Bowtie2 (--  
185 very-sensitive-local). The coverage was calculated as: (number of reads mapped ×  
186 average read length)/length of the reference sequence. For correlation analyses, coverage

187 was normalized by dividing by the total number of reads in the dataset. Pearson  
188 correlation coefficients ( $r$ ) were computed in Excel using the CORREL function.

### 189 ***Protein Identification from UPLC-MS/MS Data***

190 Ultra performance liquid chromatography-tandem mass spectrometer (UPLC-  
191 MS/MS) data were analyzed in aggregate using the SEQUEST HT search engine in  
192 ProteomeDiscoverer v1.4 (ThermoFisher Scientific) using a custom database containing  
193 the translated genes from the targeted assembly and published McrA, pMoA, MmoX and  
194 AmoA (Supplementary Data 4). Search parameters included trypsin digestion with up to  
195 one missed cleavage, methionine oxidation and cysteine carbamidomethylation. A  
196 peptide-level false discovery rate (FDR) of 5% was achieved by using the Percolator  
197 node in ProteomeDiscoverer, which utilizes the frequency of matching against a reversed  
198 database as a rigorous model of the probability of error in the forward matches at given  
199 score thresholds. Proteins identified by matches to one unique peptide per run were  
200 tallied.

### 201 ***Activity assays***

202 During the 2012 and 2013 sampling points, water samples were collected into  
203 150-mL serum vials (“biovials”) and stored at 4°C. Two days prior to sampling, 100 µL  
204 of MilliQ water was added to a 150-mL serum vial that had undergone combustion in an  
205 oven at 450°C overnight to deactivate spores. The serum vial was then sealed with a  
206 butyl rubber stopper that was cleaned by boiling in 0.1 M NaOH solution for 1 hour,  
207 rinsed and left to soak in MilliQ water until use. The serum vials were then crimped and  
208 left overnight. The next day, the serum vials were purged and pressurized with filtered  
209 N<sub>2</sub>. The vials were then autoclaved and bubble-wrapped for transport underground. A  
210 needle was attached to the end of sterile teflon tubing that was attached to the manifold.  
211 Water was allowed to flow to rinse the attachment and needle. After 2 minutes of rinsing,  
212 the needle was inserted into the biovial and a second needle was added for pressure relief.  
213 Water was allowed to flow into the biovial until the relief needle overflowed. Extensive  
214 care was taken to ensure that no visible gas bubble remained in the biovial post-sampling.

215 Two sets of enrichment experiments were performed to monitor the response of  
216 the biovial communities to methane and a variety of electron acceptors. Experiment 1  
217 contained samples from 2012 and 2013. Samples were incubated in triplicate with <sup>13</sup>C-  
218 CH<sub>4</sub> and SO<sub>4</sub><sup>2-</sup> (20 mM) or <sup>13</sup>C-CH<sub>4</sub> and NO<sub>3</sub><sup>-</sup> (20 mM) for 207 and 185 days,  
219 respectively. A control incubation with <sup>13</sup>C-CH<sub>4</sub> and no electron acceptors was monitored  
220 for 207 days to measure endogenous <sup>13</sup>CO<sub>2</sub> production (Control A). Experiment 2  
221 included samples from 2012 and 2013 that were incubated in triplicate with <sup>13</sup>C-CH<sub>4</sub> and  
222 SO<sub>4</sub><sup>2-</sup> (20 mM), NO<sub>3</sub><sup>-</sup> (20 mM) or O<sub>2</sub> (5% v/v). A killed (paraformaldehyde, 4% v/v)  
223 control without electron acceptors (Control 1) and a live control without electron acceptor  
224 or donor were included (Control 2). All samples of Experiment 2 were incubated and  
225 monitored over a 43-day period.

226 The samples for all experiments were prepared in 14-mL serum vials sealed with  
227 butyl rubber stoppers and aluminum caps. Prior to sample addition, vials were made  
228 anoxic by exchanging headspace gas with N<sub>2</sub> for 10 cycles and left pressurized (0.5 bar  
229 overpressure). 10 mL aliquots of fracture fluid were then added to the vials in an anoxic  
230 chamber and amended with the treatments described above. When <sup>13</sup>C-CH<sub>4</sub> was added,  
231 N<sub>2</sub> was added to a pressure of 130 kPa and 99.99% <sup>13</sup>C-CH<sub>4</sub> gas (Campro Scientific,  
232 Veenendaal, The Netherlands) was added to a final pressure of 180 kPa. Oxygen was

233 added afterwards, when applicable. All electron acceptor solutions were sterile and  
234 anoxic. The serum bottles were statically incubated at 37°C in the dark.

235  $\text{NO}_3^-$  and  $\text{SO}_4^{2-}$  were analysed using an ion chromatography system equipped with  
236 an Ionpac AS9-SC column and an ED 40 electrochemical detector (Dionex, Sunnyvale,  
237 CA). The system was operated at a column temperature of 35°C, and a flow rate of 1.2 ml  
238  $\text{min}^{-1}$ . Eluent consisted of a carbonate/bicarbonate solution (1.8 and 1.7 mM respectively)  
239 in deionized water. Headspace gas composition was measured on a gas chromatograph-  
240 mass spectrometer (GC-MS) composed of a Trace GC Ultra (Thermo Fisher Scientific,  
241 Waltham, MA) equipped with a Rt-QPLOT column (Restek, Bellefonte, PA), and a DSQ  
242 MS (Thermo Fisher Scientific). Helium was used as a carrier gas with a flow rate of 120  
243  $\text{ml min}^{-1}$  and a split ratio of 60. The inlet temperature was 80°C; the column temperature  
244 was set at 40°C and the ion source temperature was 200°C.  $\text{CH}_4$  and  $\text{CO}_2$  in the  
245 headspace were quantified from the peak areas in the gas chromatographs. The fractions  
246 of  $^{13}\text{CO}_2$ ,  $^{13}\text{CH}_4$  and  $^{12}\text{CH}_4$  were derived from the mass spectrum (Shigematsu *et al.*  
247 2004). Validation of the method was done using standards with known mixture of  $^{13}\text{CO}_2$   
248 and  $^{12}\text{CO}_2$ . The concentrations of total  $\text{CO}_2$ , total  $\text{CH}_4$ , and  $^{13}\text{CO}_2$  were calculated  
249 following the method of Timmers *et al.* (2015). The pressure of the serum vials was  
250 determined using a portable membrane pressure unit (GMH 3150, Greisinger electronic  
251 GmbH, Regenstauf, Germany). The pH was checked by a standard pH electrode (QiS,  
252 Oosterhout, The Netherlands).

253

## 254 **Results and Discussion:**

### 255 *A changing fluid chemistry over time*

256 Over a period of 2.5 years, water isotope analysis revealed large changes in the  
257 fracture fluid's  $\delta^2\text{H}$  and  $\delta^{18}\text{O}$  isotopic signatures (Fig. 1; purple squares). These changes  
258 are inconsistent with contamination with service water in the mine and, instead, indicate  
259 mixing of different fracture waters within the system. In 2011, the  $\delta^{18}\text{O}$  and  $\delta^2\text{H}$  values  
260 were on the global meteoric water line (GMWL) and are indicative of paleometeoric  
261 water. This isotopic signature is consistent with other fluids located approximately 1,000  
262 to 1,500 mbls in the Witwatersrand Formation (South Africa) (Fig. 1; green triangles)  
263 (Onstott *et al.* 2006; Sherwood Lollar *et al.* 2007). In 2012 and 2013, the  $\delta^{18}\text{O}$  and  $\delta^2\text{H}$   
264 signatures of the fluids moved away from the GMWL, indicating mixing with more  
265 ancient fluids (Frape *et al.* 1984). A few meters away, Be326 Bh1 (a borehole located in  
266 the same mine and depth as the Be326 borehole of this study) exhibited a similar trend in  
267  $\delta^{18}\text{O}$  and  $\delta^2\text{H}$  signatures over time—shifting away from the GMWL in 2012 and 2013  
268 (Fig. 1; red diamonds). The displacements between the 2011/2012 and 2012/2013  $\delta^{18}\text{O}$   
269 and  $\delta^2\text{H}$  signatures of the two boreholes are in opposite directions—a pattern that would  
270 not be expected if the native fracture fluids were mixing with the mine's service water  
271 during this period. Measurements of the fracture fluid's  $\delta^2\text{H}$  and  $\delta^{18}\text{O}$  isotopic signatures  
272 over the 2-week study were not obtained.

273 Geophysico-chemical measurements were made for both the 2.5-year and 2-week  
274 time series (Table 1). Temperature, pH, and  $\text{CH}_4$  concentrations were relatively  
275 unchanged in both of the time series but the degree to which  $E_h$ ,  $\text{SO}_4^{2-}$ ,  $\text{NO}_3^-$ , and  $\text{H}_2$   
276 concentrations changed was much greater over the 2.5 years (Table 1a). Within the 2.5-  
277 year time series, the fracture fluids shifted from a more reduced state (2011 $_{Eh}$  = -98 mV,  
278 2011 $_{[\text{H}_2]}$  = 130 nM) with limited electron acceptor availability (2011 $_{[\text{Sulph}]}$  = 137  $\mu\text{M}$ ,

279 2011<sub>[Nitr.]</sub> = 0.4  $\mu$ M) to a more oxidized state (2013<sub>E<sub>h</sub></sub> = 21 $\pm$ 28 mV, 2013<sub>[H<sub>2</sub>]</sub> = 25 nM)  
280 with much greater electron acceptor availability (2013<sub>[Sulph.]</sub> = 479  $\mu$ M, 2013<sub>[Nitr.]</sub> = 4.5  
281  $\mu$ M). The 2-week time series did not exhibit as large of a shift in electron acceptor  
282 availability as the 2.5-year time series and maintained a positive E<sub>h</sub> throughout (Table  
283 1b).

#### 284 **Microbial community of Be326**

285 The microbial communities of the 2011 and 2012 time points have been reported  
286 to be dominated by bacteria (98.5%) (Simkus *et al.* 2015) with the majority being related  
287 to Proteobacteria (Magnabosco *et al.* 2014). In order to investigate the community  
288 composition of the less numerous archaea, 16S rDNA amplicon sequencing of the  
289 archaeal V4-V5 hypervariable region was performed across all time points (Fig. 2a). For  
290 the long-term study (2011, 2012, 2013), the archaeal community shifted from an ANME-  
291 1- and Methanomicrobia-dominated community in 2011 to a Miscellaneous  
292 Crenarchaeotic Group-dominated community in 2012 and a Halobacteria-dominated  
293 community in 2013. For the short-term study (T<sub>0</sub>, T<sub>1</sub>, T<sub>2</sub>), there were no noticeable  
294 changes between T<sub>1</sub> and T<sub>2</sub>. A slight increase in Halobacteria and a decrease in ANME-1  
295 with respect to T<sub>1</sub> and T<sub>2</sub> were observed in the T<sub>0</sub> time point. There is a noticeable  
296 difference between the T<sub>0</sub>, T<sub>1</sub>, T<sub>2</sub> samples community profiles and the 2013 community  
297 profile, despite being collected over the same two-week period. However, the filters used  
298 in the T<sub>x</sub> and 2013 filtrations have varied pore sizes, geometries, and casings and should  
299 not be directly compared.

300 Around 1% of V4-V5 amplicons were related to “*Ca. M. nitroreducens*” in all  
301 time points except for the 2011 dataset that contained only 2 archaeal amplicons relating  
302 to “*Ca. M. nitroreducens*” (Supplementary Data 1). These relative abundances of “*Ca. M.*  
303 *nitroreducens*” are lower than what was reported using archaeal V6 primers on 2011 and  
304 2012 samples. With archaeal V6 primers, “*Ca. M. nitroreducens*” accounts for 1.5% of  
305 the archaeal community in 2011 and 10.6% of the archaeal community in 2012, while  
306 ANME-1 accounts for ~10% of the archaeal community at each time point (Young *et al.*,  
307 2017; Supplementary Fig. S1). Despite differences in the relative abundances of taxa  
308 based on the primers used, community membership does not appear to be significantly  
309 different between the 2 primer sets.

310 In order to estimate the relative activity of each taxonomic group,  
311 metatranscriptomic data from each sample were mapped to a database of Be326 Bh2 16S  
312 rDNA V6 bacterial (Magnabosco *et al.* 2014) and archaeal (Young *et al.* 2017)  
313 sequences. The V6 sequences were selected over the V4-V5 sequences due to their  
314 shorter length and stringent quality filtering procedure (see Materials & Methods).  
315 Proteobacteria within the family Rhodocyclaceae dominated all of the RNA datasets  
316 except for the 2011 dataset that was dominated by Hydrogenophilaceae. The number of  
317 bacterial and archaeal species (unique hits within the 16S rDNA V6 database) observed  
318 in the metatranscriptomic data ranged from 204 in 2013’s T<sub>0</sub> time point to 414 in the 2012  
319 sample (Table 2). MO archaea and bacteria account for only a small percentage of the V6  
320 rRNA sequences identified in the metatranscriptomic data (0.3-3%). Notably, the number  
321 of species observed in each metatranscriptome’s V6 rRNA pool was not correlated to the  
322 number of reads generated for each metatranscriptome ( $R^2 < 0.01$ ); however, the number  
323 of species observed in each metatranscriptome is almost 10 times less than the number of

324 OTU<sub>0.97</sub> obtained from the bacterial 16S rDNA V6 dataset (2,478 in 2011 and 3,987 in  
325 2012) (Magnabosco *et al.* 2014).

### 326 ***A detectable shift in the MO community over time***

327 As the organisms responsible for CH<sub>4</sub> oxidation in Be326 were present at  
328 relatively low abundances, a targeted assembly pipeline  
329 (<https://github.com/cmagnabosco/OmicPipelines>) that employs the PRICE assembler  
330 (Ruby, Bellare and DeRisi 2013) was implemented to assemble methyl-coenzyme M  
331 reductase (*mcrA*)—the gene for the first step in the anaerobic oxidation of methane  
332 (AOM) (Thauer 2011) or the last step in methanogenesis—and a suite of CH<sub>4</sub>  
333 monooxygenases (*mmo*) that are known to play a role in aerobic oxidation of methane  
334 (McDonald *et al.* 2008) from the metagenomic and metatranscriptomic datasets.  
335 Notably, *mcrA* was selected as an indicator for ANME presence because its phylogeny is  
336 congruent with MO phylogeny.

337 Following targeted assembly and annotation, two complete *mcrA* genes related to  
338 ANME-1 and “*Ca. M. nitroreducens*”, an ANME-2d, were assembled. Only one  
339 complete *mmo* gene closely related to *Methylococcus capsulatus* was recovered from the  
340 metagenomic and metatranscriptomic data (Fig. 2b, Supplementary Data 2). Partial *mcrA*  
341 related to Methanomicrobia and Methanobacteria were also identified in the high-  
342 throughput data (Fig. 2b, Supplementary Data 2), but partially assembled *mmo*-related  
343 genes were omitted in downstream analyses due to the difficulty in distinguishing *mmo*  
344 from homologous ammonia monooxygenases genes (Holmes *et al.* 1995).

345 Assembled *mcrA* and *mmo* were translated into peptide sequences  
346 (Supplementary Data 3). Notably, the Be326 “*Ca. M. nitroreducens*”-type McrA was  
347 99% identical to the McrA of the reference “*Ca. M. nitroreducens*” genome  
348 (Supplementary Data 3, 4). Metaproteomic data were searched against the collection of  
349 assembled McrA and MMO and a database of known McrA and MMO peptide sequences  
350 (Supplementary Data 4) to confirm that the transcribed genes were translated into  
351 proteins. The predicted amino acid sequences (Supplementary Data 3) from the  
352 assembled ANME-1, “*Ca. M. nitroreducens*”, and *Methylococcus* genes were all  
353 identified within the metaproteomic data (Fig. 3, Supplementary Data 5) which further  
354 confirmed the presence and activity of these groups of organisms.

355 The abundances (based on coverage) of each MO gene (*mcrA*, *mmo*) and MO 16S  
356 SSU rRNA gene were calculated using Bowtie2 (Langmead and Salzberg 2012) (-very-  
357 sensitive-local) and BLASTn, respectively. These analyses provided evidence that the  
358 dominant members of the MO community in the metagenomes and metatranscriptomes  
359 shifted from ANME-1 to “*Ca. M. nitroreducens*” during the 2.5-year sampling period  
360 (Fig. 2) but remained constant during the 2-week sampling period (Supplementary Table  
361 1). These observations were consistent with the relative changes in geochemistry over  
362 both time scales (Table 1). Notably, “*Ca. M. nitroreducens*” accounted for ≤1% of the  
363 archaeal community, as revealed using archaeal V4-V5 16S rDNA primers (Fig. 1),  
364 which is in contrast to the higher estimates of “*Ca. M. nitroreducens*” found when using  
365 archaeal V6 16S rDNA (Young *et al.*, 2017; Supplementary Fig. S1), metagenomic and  
366 metatranscriptomic data. This discrepancy suggests that “*Ca. M. nitroreducens*”  
367 sequences are recovered at a lower efficiency in archaeal V4-V5 16S SSU rRNA gene  
368 surveys relative to archaeal V6 16S SSU rRNA gene surveys, metagenomic and  
369 metatranscriptomic studies.



370 When metagenomic MO *mcrA* and *mmo* abundances of the long-term study  
371 (Supplementary Table 2) were correlated to geophysico-chemical measurements, “*Ca. M.*  
372 *nitroreducens*” was positively correlated to  $\text{NO}_3^-$  ( $R^2=0.99$ ) and  $\text{SO}_4^{2-}$  ( $R^2=0.98$ )  
373 concentrations but negatively correlated to  $\text{CH}_4$  ( $R^2=0.99$ ) and  $\text{H}_2$  ( $R^2=0.99$ )  
374 concentrations. ANME-1 *mcrA* abundances showed an opposite trend and were positively  
375 correlated to  $\text{CH}_4$  ( $R^2=0.96$ ) and  $\text{H}_2$  ( $R^2=0.97$ ) concentrations but negatively correlated  
376  $\text{NO}_3^-$  ( $R^2=0.88$ ) and  $\text{SO}_4^{2-}$  ( $R^2=0.85$ ) concentrations (Table 3). Correlation of  
377 metatranscriptomic 16S rRNA and *mcrA* and *mmo* abundances to geophysico-chemical  
378 measurements exhibited similar trends (Supplementary Table 3) and are consistent with a  
379 transition from an ANME-1-dominated MO community to a “*Ca. M. nitroreducens*”-  
380 dominated community. As  $\text{NO}_3^-$ -coupled  $\text{CH}_4$  oxidation is more energetic than  $\text{SO}_4^{2-}$ -  
381 coupled  $\text{CH}_4$  oxidation (Caldwell *et al.* 2008), an energetic advantage, presumably,  
382 provides “*Ca. M. nitroreducens*” a competitive advantage against ANME-1 when  $\text{NO}_3^-$   
383 concentrations are sufficient.

384  $\text{O}_2$  concentrations in 2011 and 2013 were below detection limit (Table 1) but were  
385 detectable in 2012 ( $0.47 \mu\text{M}$ ). Likely related to the increased availability of  $\text{O}_2$ , aerobic  
386 *Methylococcus*-related *mmo* genes exhibited their highest relative abundances within  
387 metagenomic and metatranscriptomic MO gene profiles during 2012 and a minimal  
388 presence throughout the remainder of the time points (Fig. 2, Supplementary Table 1).  
389 “*Ca. M. nitroreducens*” was the dominant member ( $73.2 \pm 2.8\%$ ) of the MOs community  
390 during the 2-week time series (Supplementary Table 1) when fracture fluids contained  
391 high concentrations of  $\text{SO}_4^{2-}$  ( $496 \pm 36 \mu\text{M}$ ) and  $\text{NO}_3^-$  ( $4.8 \pm 0.9 \mu\text{M}$ ) along with a positive  
392  $E_h$  ( $21 \pm 28 \text{ mV}$ ).

393 The correlations between MO abundances and fluid chemistry suggest that a  
394 relationship between electron acceptor availability and populations of MOs exists. We  
395 therefore wanted to experimentally validate the response of the MOs to changes in  
396 electron acceptor availability. As ANME-1, “*Ca. M. nitroreducens*”, and *Methylococcus*  
397 are best described as a  $\text{SO}_4^{2-}$ -dependent ANME (Wegener *et al.* 2015),  $\text{NO}_3^-$ -dependent  
398 ANME (Haroon *et al.* 2013), and aerobic methanotrophs (Kleiveland *et al.* 2012),  
399 respectively, we designed experiments to test whether or not each MO lifestyle would  
400 respond to an increase in the aforementioned electron acceptor.

#### 401 **Validation of the MO community through $^{13}\text{C-CH}_4$ enrichments**

402 To better understand the response of the MO community to changes in electron  
403 donor/acceptor balance, two sets of  $^{13}\text{C-CH}_4$  laboratory enrichment experiments were  
404 performed on fracture water collected in 2012 and 2013. The first experiment  
405 (Experiment 1) was a long-term experiment analyzed over 207\* days and contained  
406 fracture fluid samples from 2012 and 2013 enriched with either  $^{13}\text{C-CH}_4$  and no  
407 additional electron acceptor (endogenous activity control),  $^{13}\text{C-CH}_4+\text{SO}_4^{2-}$  (to stimulate  
408  $\text{SO}_4^{2-}$ -dependent AOM), or  $^{13}\text{C-CH}_4+\text{NO}_3^-$  (to stimulate  $\text{NO}_3^-$ -dependent AOM). A  
409 second set of 2012 and 2013 fracture fluid enrichments (Experiment 2) was analyzed for  
410 43 days. Experiment 2 contained  $^{13}\text{C-CH}_4$  treatments of  $^{13}\text{C-CH}_4$ +formaldehyde (4%,  
411 v/v) (killed control) to rule out non-biological sources of  $^{13}\text{C-CH}_4$  production,  $^{13}\text{C-}$   
412  $\text{CH}_4+\text{SO}_4^{2-}$ ,  $^{13}\text{C-CH}_4+\text{O}_2$  (to simulate aerobic methane oxidation), and  $^{13}\text{C-CH}_4+\text{NO}_3^-$  as  
413 well as an electron acceptor- and donor-free control (methanogenesis control). The

---

\* The long term  $^{13}\text{C-CH}_4+\text{NO}_3^-$  enrichments were run for 183 days.

414 methanogenesis control was intended to detect whether or not methanogenesis, and  
415 therefore also trace CH<sub>4</sub> oxidation (TMO), was occurring within the samples (Zehnder  
416 and Brock 1979). Due to the limited amount of sample, we were unable to test the  
417 potential occurrence of Mn<sup>4+</sup>- or Fe<sup>3+</sup>-driven methane oxidation.

418 Unlike the correlations observed between expression data and geochemical  
419 parameters, an increase in the proportion of <sup>13</sup>C-CO<sub>2</sub> relative to total CO<sub>2</sub> (%<sup>13</sup>C-CO<sub>2</sub>) in  
420 the <sup>13</sup>CH<sub>4</sub> enrichments over time provides definitive evidence of <sup>13</sup>CH<sub>4</sub> oxidation under  
421 different conditions. Notably, we chose to express our results as %<sup>13</sup>C-CO<sub>2</sub> rather than  
422 the absolute concentration (molar) of <sup>13</sup>C-CO<sub>2</sub> to account for CO<sub>2</sub> production from other  
423 substrates. In Experiment 1, the <sup>13</sup>C-CH<sub>4</sub>+NO<sub>3</sub><sup>-</sup> enrichments exhibited the greatest rate of  
424 %<sup>13</sup>C-CO<sub>2</sub> production and, in 2012, the rate of %<sup>13</sup>C-CO<sub>2</sub> production (0.017±0.005 %<sup>13</sup>C-  
425 CO<sub>2</sub> day<sup>-1</sup>) was found to be significantly greater (paired one-tailed Student t-test; *p*=0.02)  
426 than in Control A (0.004±0.001 %<sup>13</sup>C-CO<sub>2</sub> day<sup>-1</sup>) (Fig. 4). No samples from Experiment  
427 2 exhibited an increase in %<sup>13</sup>C-CO<sub>2</sub> production (Supplementary Data 5).

428 Although ANME-1 were present in the metatranscriptomic and metaproteomic  
429 data during the 2012 and 2013 sampling points, there was not a significant difference in  
430 %<sup>13</sup>C-CO<sub>2</sub> production between Experiment 1's <sup>13</sup>C-CH<sub>4</sub>+SO<sub>4</sub><sup>2-</sup> incubations and the  
431 endogenous activity controls (Fig. 4). TMO was probably not responsible for the <sup>13</sup>C-CO<sub>2</sub>  
432 production in the endogenous activity controls of Experiment 1; only the methanogenesis  
433 control of the 2013 sample showed minor methanogenesis (and thus TMO) activity  
434 (Supplementary Data 5). It is conceivable, however, that SO<sub>4</sub><sup>2-</sup>-dependent AOM occurred  
435 in both the endogenous controls and <sup>13</sup>C-CH<sub>4</sub>+SO<sub>4</sub><sup>2-</sup> incubations, as the concentrations of  
436 SO<sub>4</sub><sup>2-</sup> in the controls ([SO<sub>4</sub><sup>2-</sup><sub>2012</sub>] = 623 μM; [SO<sub>4</sub><sup>2-</sup><sub>2013</sub>] = 479 μM) are well within the  
437 lower range of SO<sub>4</sub><sup>2-</sup> concentrations (100-1200 μM) that have been reported for SO<sub>4</sub><sup>2-</sup>-  
438 coupled AOM (Beal, Claire and House 2011; Segarra *et al.* 2015). Combined, these  
439 findings suggest that SO<sub>4</sub><sup>2-</sup>-coupled AOM likely occurred in the controls of Experiment 1  
440 and 2.

441

## 442 **Conclusions:**

443 Metagenomic, metatranscriptomic, and metaproteomic data suggest that  
444 community composition, activity, and function are changing in response to natural  
445 fluctuations in fluid chemistry. The observed CH<sub>4</sub> oxidation in the controls and  
446 dominance of ANME-1 in the 2011 samples (when SO<sub>4</sub><sup>2-</sup> concentrations were lowest)  
447 indicate that the *in situ* fluids contain enough SO<sub>4</sub><sup>2-</sup> to power SO<sub>4</sub><sup>2-</sup>-coupled MO. The  
448 increase in %<sup>13</sup>C-CO<sub>2</sub> production in the <sup>13</sup>C-CH<sub>4</sub>+NO<sub>3</sub><sup>-</sup> enrichments and correlation of  
449 “*Ca. Methanoperedens*” abundances to electron acceptor concentrations *in situ* suggest  
450 that electron acceptor availability plays an important role in MO population dynamics.  
451 Together, these results provide the most conclusive biological evidence to date that CH<sub>4</sub>  
452 oxidation occurs and is an integral component of the deep terrestrial subsurface carbon  
453 cycle.

454

## 455 **Data Availability:**

456 Metagenomic and metatranscriptomic data are available at NCBI BioProject  
457 PRJNA308990. 16S amplicon data are available under NCBI BioProject PRJNA263371.

458

459

460 **Tables and Figures:**

461

462 **TABLE 1a. Geophysico-chemical measurements for the long-term study**

463

|                                         | <b>2011</b>     | <b>2012</b>      | <b>2013</b>    |
|-----------------------------------------|-----------------|------------------|----------------|
| <b>Dates Sampled</b>                    | Jan 21-27, 2011 | July 12-27, 2012 | Aug 1-15, 2013 |
| <b>Temperature (°C)</b>                 | 36.9            | 37.3±1.2         | 35.1±0.8       |
| <b>pH</b>                               | 8.83            | 8.55             | 8.17±0.7       |
| <b>E<sub>h</sub> (mV)</b>               | -98             | -27.5±6.4        | 21±28          |
| <b>SO<sub>4</sub><sup>2-</sup> (μM)</b> | 137             | 623              | 479            |
| <b>NO<sub>3</sub><sup>-</sup> (μM)</b>  | 0.4             | 6.0              | 4.5            |
| <b>O<sub>2</sub> (Chemet) (μM)</b>      | b.d.            | 0.47             | b.d.*          |
| <b>H<sub>2</sub> (nM)</b>               | 130             | 9                | 25             |
| <b>CH<sub>4</sub> (mM)</b>              | 2.0             | 0.9              | 1.1            |

464

465 b.d. = below detection (<0.31 μM)

466 b.d.\* = below detection (<1.6 μM)

467

468 **Table 1b. Geophysico-chemical measurements for the short-term study**

469

|                                         | <b>T<sub>0</sub></b> | <b>T<sub>1</sub></b> | <b>T<sub>2</sub></b> |
|-----------------------------------------|----------------------|----------------------|----------------------|
| <b>Dates Sampled</b>                    | Aug 1, 2013          | Aug 8, 2013          | Aug 15, 2013         |
| <b>Temperature (°C)</b>                 | 35.8                 | 35.3                 | 28.6                 |
| <b>pH</b>                               | 8.2                  | 8.1                  | 7.9                  |
| <b>E<sub>h</sub> (mV)</b>               | 9                    | 53                   | 1                    |
| <b>SO<sub>4</sub><sup>2-</sup> (μM)</b> | 531                  | 499                  | 459                  |
| <b>NO<sub>3</sub><sup>-</sup> (μM)</b>  | 5.3                  | 5.3                  | 3.7                  |
| <b>O<sub>2</sub> (Chemet) (μM)</b>      | b.d.*                | b.d.*                | b.d.*                |
| <b>H<sub>2</sub> (nM)</b>               | 5.8×10 <sup>-5</sup> | 10.4                 | 39.8                 |
| <b>CH<sub>4</sub> (mM)</b>              | 0.8                  | 1.2                  | 1.0                  |

470 b.d.\* = below detection (<1.6 μM)

471

472

473

474

475

476

477

478

479

480

481

482

483

484

485 **Table 2: Metatranscriptomic species richness observed and estimated by Chao 1**  
 486 **and ACE metrics and cell concentrations measured in the field.**

|                                                                   | 2011                                    | 2012                                  | 2013             | T <sub>0</sub>   | T <sub>1</sub> | T <sub>2</sub> |
|-------------------------------------------------------------------|-----------------------------------------|---------------------------------------|------------------|------------------|----------------|----------------|
| <b>Species (S) Observed</b>                                       | 302                                     | 414                                   | 247              | 222              | 204            | 248            |
| <b>S.Chao1</b>                                                    | 344±22                                  | 440±10                                | 256±7            | 233±9            | 216±8          | 276±16         |
| <b>S.ACE</b>                                                      | 317±8                                   | 450±10                                | 253±6            | 233±5            | 212±7          | 260±8          |
| <b>Cell concentration (×10<sup>3</sup> cells mL<sup>-1</sup>)</b> | 1.3 <sup>^</sup> -<br>18.3 <sup>*</sup> | 2.2 <sup>*</sup> -<br>31 <sup>^</sup> | 3.2 <sup>^</sup> | 3.2 <sup>^</sup> | n.m.           | n.m.           |

487 <sup>^</sup>DAPI-derived cell concentration

488 <sup>\*</sup>PLFA-derived cell concentration using a conversion factor of 6×10<sup>4</sup> cells/pmol PLFA as  
 489 previously reported in Simkus et al. (2015)

490 n.m. = not measured

491

492

493

494

495

496

497 **Table 3:** Correlation (R<sup>2</sup>) between normalized metagenomic *mcrA* or *mmo* PEG coverage  
 498 and geochemical parameters. Positive correlations are underlined.

499

|                                 |                                | NO <sub>3</sub> <sup>-</sup> | SO <sub>4</sub> <sup>2-</sup> | CH <sub>4</sub> | E <sub>h</sub> | pH          | H <sub>2</sub> |
|---------------------------------|--------------------------------|------------------------------|-------------------------------|-----------------|----------------|-------------|----------------|
| <b>2.5-Year<br/>Time Series</b> | “ <i>Ca. Methanoperedens</i> ” | <u>0.99</u>                  | <u>0.98</u>                   | 0.99            | <u>0.70</u>    | 0.52        | 0.99           |
|                                 | ANME-1                         | 0.88                         | 0.85                          | <u>0.93</u>     | 0.90           | <u>0.76</u> | <u>0.95</u>    |
|                                 | <i>Methylococcales</i>         | <u>0.12</u>                  | <u>0.14</u>                   | 0.07            | 0.10           | <u>0.25</u> | 0.05           |

500

501

502

503

504

505

506

507 **Figure 1.  $\delta^2\text{H}_{\text{H}_2\text{O}}$  and  $\delta^{18}\text{O}_{\text{H}_2\text{O}}$  for Beatrix (Be) Gold Mine fracture fluids.**  
 508 This figure plots the  $\delta^{18}\text{O}$  (x-axis) against the  $\delta^2\text{H}$  (y-axis) for each of the three time  
 509 points (purple squares) in the long-term study of Be326 (2011, 2012, 2013). The black  
 510 diagonal line represents the global meteoric water line (Craig 1961) (GMWL). The 2011  
 511 sample sits on the GMWL, consistent with historic Be datapoints (green triangles) and  
 512 paleometeoric water (Lippmann *et al.* 2003; Ward *et al.* 2004). The 2012 and 2013 time  
 513 points are displaced away from the GMWL along trends that have been observed to be  
 514 consistent with mixing with older, more saline fracture fluids (Ward *et al.* 2004;  
 515 Sherwood Lollar *et al.* 2007). The dotted blue lines indicate possible mixing patterns.  
 516 Be326\_Bh1 (red diamonds) is a borehole located in the same mine and at the same depth  
 517 as the borehole sampled in this study. EV=Evander Mine; KL=Kloof. Data for EV, KL,  
 518 and Adams are adapted from Ward *et al.* (2004).

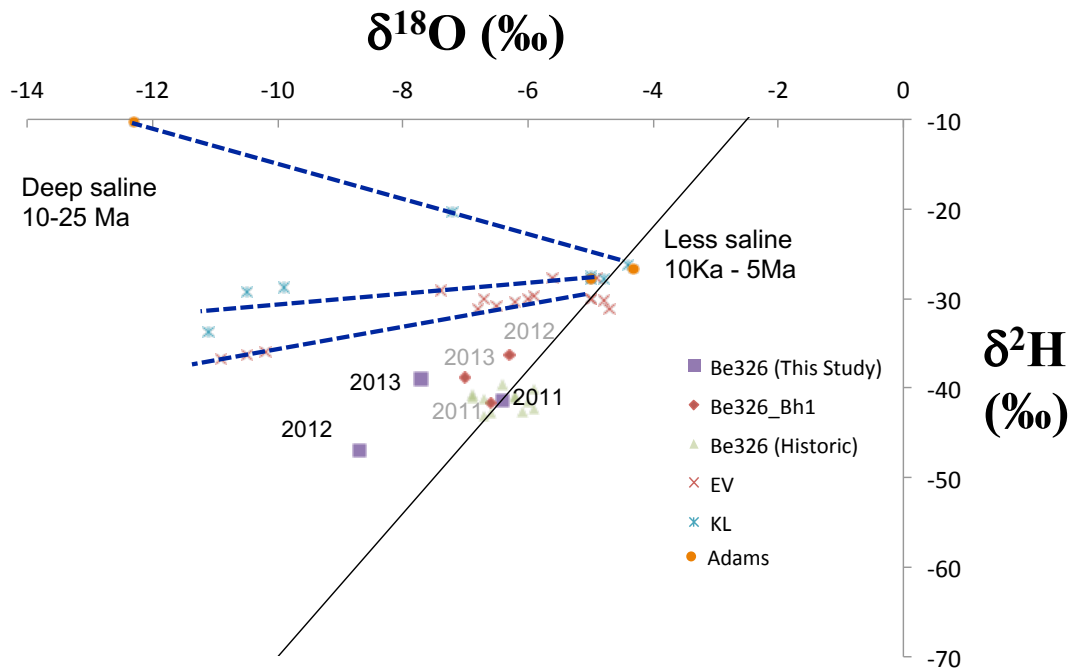

519  
 520  
 521  
 522  
 523  
 524  
 525  
 526  
 527  
 528  
 529  
 530

531 **Figure 2. Change in the CH<sub>4</sub> oxidizing community and activity over time.**  
 532 a) The relative abundance (bar height) of major archaeal groups (colors of bars) identified  
 533 in the archaeal V4-V5 16S rDNA surveys are shown. b) A phylogenetic tree was  
 534 constructed using PhyML from a McrA peptide database (Supplementary Data 6) and the  
 535 predicted proteins from the *mcrA* targeted assembly (designated by a \*). The predicted  
 536 MMO from the targeted assembly is also displayed. The 2×3 blocks represent the relative  
 537 abundance of each taxon (DNA, left column; RNA, right column) with respect to their  
 538 CH<sub>4</sub>-related protein of interest (McrA or MMO) over time (row 1, 2011; row 2, 2012;  
 539 row 3; 2013). Notably, Methanobacteria-related McrA PEGs were selected as the outgroup  
 540 in this presentation of the McrA phylogenetic tree due to Methanobacteria's placement in  
 541 species tree of Euryarchaeota.  
 542

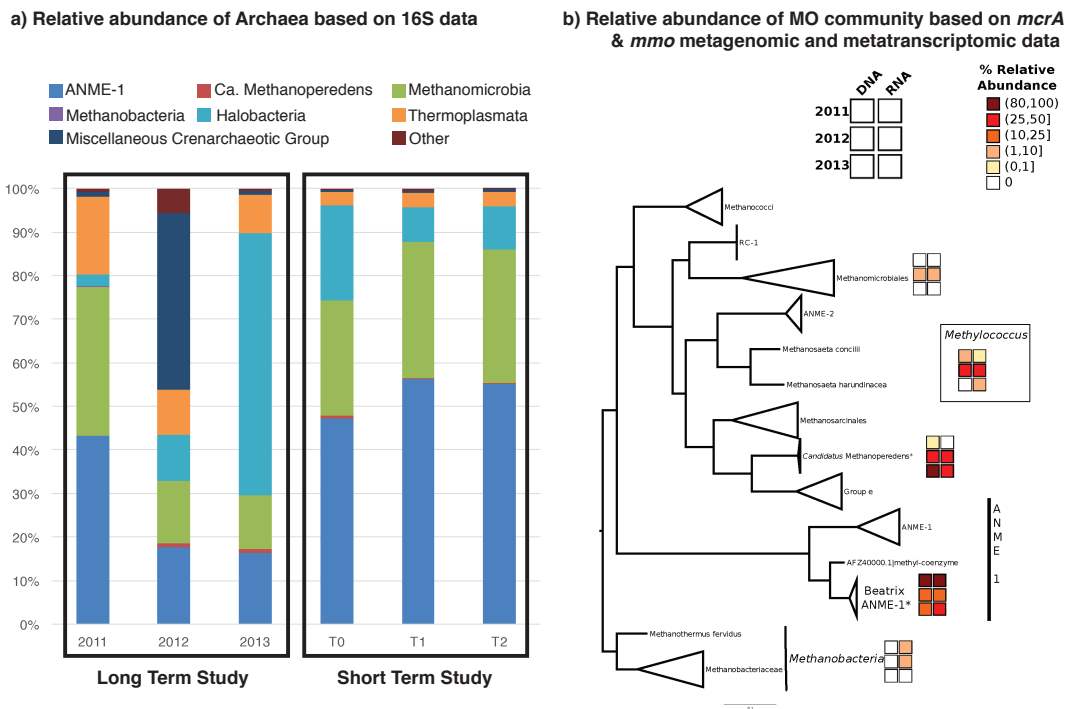

543  
 544  
 545  
 546  
 547  
 548  
 549  
 550  
 551  
 552  
 553  
 554

555  
556

Figure 3: Peptide mapping to identified McrA and MMO proteins

A)

```
1 1 10 20 30 40 50
1  MPHRDAQHSFLKAMSDKFVEKPESTKTKFYVYGSKDPRYAVGGLAQKGAF
51  RKREFIDDAKIVAERVQGTTPAYNPDVGMPOGQRFLMPYILNHTDIMCYH
101  DDLHVNNAAQQAWDDMRRTIVLGLDDAHGILETRLGKEVTPDTINHYL
151  EVCNHCLPGAALIQEHMVETKPALVADSYVKVFTGDDDLADALDRRMLLD
201  INKEFPAGWEKPGEQADQLKGTIGKKLWQALYMPTIVGRMTDGGTMRWV
251  GMQVGMTMINAYKVCAGESATGEFMAFKHASVVMANYMPVRRARAQNE
301  PGGLPLGICCDCTRSPALFPMDPVRAELEAIAIGALVYDQLWFGIYMSGG
351  VGFTQYASATYTDNILEDFCYKGDEIAIDMPGERGKAEPMTMENIEKLTRA
401  GSDYCLTQYEAYPTVAESHFGGSVRAACQSAGAATCVASATADAQAALNS
451  WALAQLLHYASVGRLLGFYGYDLQDQCTSSTSFAYRSEGLPEMRGVNYP
501  NFAMNVGHQSAYAGLNAGAHLSRKDAWVLSPLIKVAFSDRDLPFDWGYTT
551  REYGRGALREFKPAGERDLIIP
```

T Threonine substituted for Alanine in 4 of the 8 assembled PEGs  
Peptides (13) unique to ANME-1 sequences assembled in this study  
Peptides (1) shared with an uncultured archaeon GZfos19C7 (AAU82711.1)

B)

```
1 1 10 20 30 40 50
1  VSQMAEPRFKKAMETKYAKWGTNKCSTAKSKITDKKTKYLRGYTQNP
51  RKVEMTKCGAAITKKRGLQAYDKLHLAGIPMGQRQLTPYTISGTDIVCD
101  GDDLHFVNNAAMQQEWDDIRRTCIVGLDLAHETLEKRLGKEVTPETINYY
151  LEVLNHAMPGAAIVQEHMVETHPALVDDCYVKVFTGDETLQDEIDKQPVI
201  NIDNEFPABQAKQIKAGIGKTSWQAVHIPTIVTRTEDGPTSRMMAMQVG
251  MTFISAYHMCAGEAAVGELAFTAKHAGLVEMSDMIPARRARGPNEPGGLES
301  FGHMADIVQTSRKTPDDPVNVALQTASAASMLYDQIWLGGYMSGGVGPTM
351  YATPAYTNDILDDYVYWGADYAQKKYGKFGSAKATIETVKDIGTEVTLYG
401  IEAYEKYPTTLEDHFGGSQRATVLAIAAGASTAMATGHSNAGLSAWYLSM
451  YLHKEAWGRLGFYGYDLQDQCGATNVFSLGSDEGAIGEVRGANYPNYAMN
501  VGHQGGYTTVVSAAHAGKKDAPCVNPLVKSCFADDLVNPDPADPRGAPFK
551  AALREWDRCAGERAFVIPAK
```

Q Glutamine substituted for Lysine in 2 of the 6 assembled PEGs  
V Valine substituted for Glycine in 2 of the 6 assembled PEGs  
A Alanine substituted for Aspartic Acid in 2 of the 6 assembled PEGs  
Peptides (8) unique to *Ca. Methanoperedens nitroreducens* (WP\_048089615.1)  
Peptides (1) shared with *Methanococcoides methylutens* (WP\_048204805.1)  
Peptides (1) shared with *Methanomethylovorans hollandica* (WP\_015325028.1)

C)

```
1 1 10 20 30 40 50
1  MKTIKDRIAKWSAIGLLSAVAATAFYAPSASAHGEKSQAAFMRMRTIHWY
51  DLSWSKEKVKINETVEIKGKFHVPEGWPETVDEPDVAFLNVGMPGPVFIR
101  KESYIGGQLVPRSVRLEIGKTYDFRVVLKARRPGDWHVHTMMNVQGGPI
151  IGPGKWITVEGSMSEFRNPVTTLTGQTVDLENYNEGNTYFWHAFWFAIGV
201  AWIGYWSRRPIIPRLLMVDAGRADELVSATDRKVAMGFLAATILIVVMA
251  MSSANSKYPITIPLQAGTRGMKPLELPAPTVSVKVEDATYRVPGRAMM
301  KLTITNHGNSPIRLGEFYTASVRFLDSDVYKDTTGYPEDLLAEDGLSVSD
351  NSPLAPGETRTVDVTASDAAWEVYRLSDIYDPDSRFAGLLFFDATGNR
401  QVVQIDAPLIPSFM
```

Peptides (4) unique to *Methylococcus capsulatus* (WP\_010961049.1)  
Peptides (1) shared with *Methylocaldum szegediense* (WP\_026609852.1)

557  
558

559 **Figure 4:  $^{13}\text{C}$ - $\text{CO}_2$  production after  $^{13}\text{C}$ - $\text{CH}_4$  enrichment.**  
 560 The rates of  $^{13}\text{C}$ - $\text{CO}_2$  production ( $\%^{13}\text{C}\text{-CO}_2 \text{ day}^{-1}$ ) from the 2012 (gray) and 2013 (black)  
 561 fluids of Experiment 1 are displayed. The 2012 samples were run in triplicate and the  
 562 standard deviations are shown. The star above the 2012  $\text{CH}_4+\text{NO}_3$  bar indicates that the  
 563 rate of  $^{13}\text{C}$ - $\text{CO}_2$  production in the  $^{13}\text{C}\text{-CH}_4+\text{NO}_3^-$  enrichment was significantly greater  
 564 ( $p=0.02$ ) than the electron acceptor-free control (Control A).  
 565

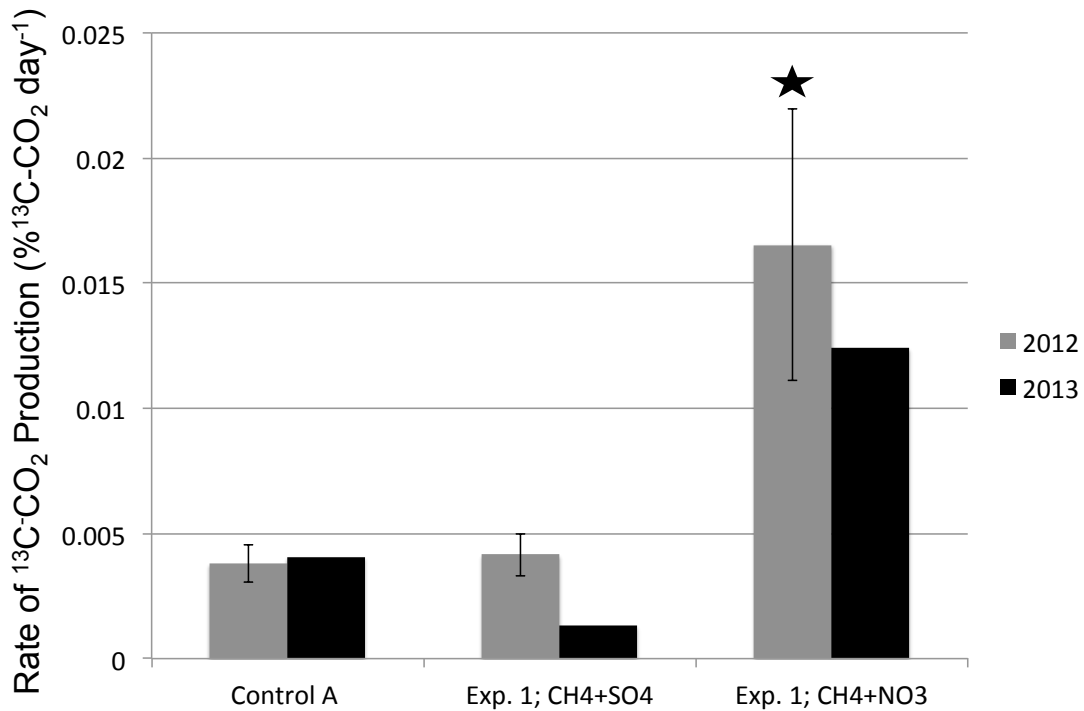

566  
 567  
 568  
 569  
 570  
 571  
 572  
 573  
 574  
 575  
 576  
 577  
 578  
 579  
 580  
 581  
 582  
 583  
 584



585 **Supplement:**  
586 Supplementary Figure S1 – Relative abundance of archaeal 16S SSU rRNA gene v6  
587 amplicons for the 2011 and 2012 time points  
588 Supplementary Table 1 – CH<sub>4</sub> oxidizing community with respect to their CH<sub>4</sub>-related  
589 gene  
590 Supplementary Table 2 – Normalized coverage CH<sub>4</sub>-related genes abundances  
591 Supplementary Table 3 – Correlation of CH<sub>4</sub> oxidizing community activity to fluid  
592 chemistry  
593 Supplementary Data 1 – Archaeal V4-V5 16S rDNA annotations  
594 Supplementary Data 2 – Assembled *mcrA* and *mmo* genes  
595 Supplementary Data 3 – Predicted proteins from assembled *mcrA* and *mmo*  
596 Supplementary Data 4 – Datasets used for protein mapping  
597 Supplementary Data 5 – Protein mapping results  
598 Supplementary Data 6 – Enrichment experiment results  
599 Supplementary Data 7 – McrA protein library used to generate phylogenetic tree

## 600 **Acknowledgments**

601 This research was supported by funding from the National Science Foundation to T.C.O.  
602 (EAR-0948659) and to TLK (EAR-0948335) and the Deep Carbon Observatory (Alfred  
603 P. Sloan Foundation) to M.C.Y.L. (Sloan 2013-10-03, subaward 48045). Research of  
604 P.H.A.T. is supported by the Soehngen Institute of Anaerobic Microbiology (SIAM)  
605 Gravitation grant (024.002.002) of the Netherlands Ministry of Education, Culture and  
606 Science and the Netherlands Organisation for Scientific Research (NWO). Partial support  
607 for isotopic analyses was provided by the Natural Sciences and Engineering Research  
608 Council of Canada. We are indebted to the logistical support of Sibanye Gold Limited,  
609 the management and staff of Beatrix Gold Mine and specifically to S. Maphanga of  
610 Beatrix gold mine. We thank Matthew Cahn (Department of Molecular Biology,  
611 Princeton University) and the staff of Research Computing (Office of Information  
612 Technology, Princeton University), especially Robert Knight, for their technical support  
613 with the computational analyses.

614

## 615 **References**

616 Bagnoud A, Chourey K, Hettich RL *et al.* Reconstructing a hydrogen-driven microbial  
617 metabolic network in Opalinus Clay rock. *Nat Commun* 2016;**7**.  
618 Beal EJ, Claire MW, House CH. High rates of anaerobic methanotrophy at low sulfate  
619 concentrations with implications for past and present methane levels. *Geobiol*  
620 2011;**9**:131–9.  
621 Caldwell SL, Laidler JR, Brewer EA *et al.* Anaerobic oxidation of methane: mechanisms,  
622 bioenergetics, and the ecology of associated microorganisms. *Environ Sci Technol*  
623 2008;**42**:6791–9.  
624 Daly RA, Borton MA, Wilkins MJ *et al.* Microbial metabolisms in a 2.5-km-deep  
625 ecosystem created by hydraulic fracturing in shales. *Nat Microbiol* 2016;**1**:16146.  
626 Ettwig KF, Butler MK, Le Paslier D *et al.* Nitrite-driven anaerobic methane oxidation by  
627 oxygenic bacteria. *Nature* 2010;**464**:543–8.  
628 Ettwig KF, Zhu B, Speth D *et al.* Archaea catalyze iron-dependent anaerobic oxidation of

629 methane. *Proc Natl Acad Sci* 2016;**113**:12792–6.

630 Frappe SK, Fritz P, McNutt RH t. Water-rock interaction and chemistry of groundwaters  
631 from the Canadian Shield. *Geochim Cosmochim Acta* 1984;**48**:1617–27.

632 Guindon S, Dufayard J-F, Lefort V *et al.* New algorithms and methods to estimate  
633 maximum-likelihood phylogenies: assessing the performance of PhyML 3.0. *Syst*  
634 *Biol* 2010;**59**:307–21.

635 Haroon MF, Hu S, Shi Y *et al.* Anaerobic oxidation of methane coupled to nitrate  
636 reduction in a novel archaeal lineage. *Nature* 2013;**500**:567–70.

637 Holmes AJ, Costello A, Lidstrom ME *et al.* Evidence that participate methane  
638 monooxygenase and ammonia monooxygenase may be evolutionarily related. *FEMS*  
639 *Microbiol Lett* 1995;**132**:203–8.

640 Huse SM, Dethlefsen L, Huber JA *et al.* Exploring microbial diversity and taxonomy  
641 using SSU rRNA hypervariable tag sequencing. *PLoS Genet* 2008;**4**, DOI:  
642 10.1371/journal.pgen.1000255.

643 Kleiveland CR, Hult LTO, Kuczkowska K *et al.* Draft genome sequence of the methane-  
644 oxidizing bacterium *Methylococcus capsulatus* (Texas). *J Bacteriol* 2012;**194**:6626.

645 Langmead B, Salzberg SL. Fast gapped-read alignment with Bowtie 2. *Nat Methods*  
646 2012;**9**:357–9.

647 Lau MCY, Cameron C, Magnabosco C *et al.* Phylogeny and phylogeography of  
648 functional genes shared among seven terrestrial subsurface metagenomes reveal N-  
649 cycling and microbial evolutionary relationships. *Front Microbiol* 2014;**5**.

650 Lau MCY, Kieft TL, Kuloyo O *et al.* An oligotrophic deep-subsurface community  
651 dependent on syntrophy is dominated by sulfur-driven autotrophic denitrifiers. *Proc*  
652 *Natl Acad Sci* 2016:201612244.

653 Magnabosco C, Tekere M, Lau MCY *et al.* Comparisons of the composition and  
654 biogeographic distribution of the bacterial communities occupying South African  
655 thermal springs with those inhabiting deep subsurface fracture water. *Front*  
656 *Microbiol* 2014;**5**:679.

657 McDonald IR, Bodrossy L, Chen Y *et al.* Molecular ecology techniques for the study of  
658 aerobic methanotrophs. *Appl Environ Microbiol* 2008;**74**:1305–15.

659 Morozova D, Wandrey M, Alawi M *et al.* Monitoring of the microbial community  
660 composition in saline aquifers during CO<sub>2</sub> storage by fluorescence in situ  
661 hybridisation. *Int J Greenh Gas Control* 2010;**4**:981–9.

662 Morozova D, Zettlitzer M, Let D *et al.* Monitoring of the microbial community  
663 composition in deep subsurface saline aquifers during CO<sub>2</sub> storage in Ketzin,  
664 Germany. *Energy Procedia* 2011;**4**:4362–70.

665 Onstott TC, Lin L-H, Davidson M *et al.* The origin and age of biogeochemical trends in  
666 deep fracture water of the Witwatersrand Basin, South Africa. *Geomicrobiol J*  
667 2006;**23**:369–414.

668 Purkamo L, Bomberg M, Nyysönen M *et al.* Dissecting the deep biosphere: retrieving  
669 authentic microbial communities from packer-isolated deep crystalline bedrock

670 fracture zones. *FEMS Microbiol Ecol* 2013;**85**:324–37.

671 Rajala P, Bomberg M, Kietäväinen R *et al.* Rapid reactivation of deep subsurface  
672 microbes in the presence of C-1 compounds. *Microorganisms* 2015;**3**:17–33.

673 Ruby JG, Bellare P, DeRisi JL. PRICE: software for the targeted assembly of  
674 components of (meta) genomic sequence data. *G3 Genes/ Genomes/ Genet*  
675 2013;**3**:865–80.

676 Segarra KEA, Schubotz F, Samarkin V *et al.* High rates of anaerobic methane oxidation  
677 in freshwater wetlands reduce potential atmospheric methane emissions. *Nat*  
678 *Commun* 2015;**6**.

679 Sherwood Lollar B, Voglesonger K, Lin L-H *et al.* Hydrogeologic controls on episodic  
680 H<sub>2</sub> release from Precambrian fractured rocks-Energy for deep subsurface life on  
681 Earth and Mars. *Astrobiology* 2007;**7**:971–86.

682 Shigematsu T, Tang Y, Kobayashi T *et al.* Effect of dilution rate on metabolic pathway  
683 shift between acetoclastic and nonacetoclastic methanogenesis in chemostat  
684 cultivation. *Appl Environ Microbiol* 2004;**70**:4048–52.

685 Simkus DN, Slater GF, Lollar BS *et al.* Variations in microbial carbon sources and  
686 cycling in the deep continental subsurface. *Geochim Cosmochim Acta* 2015.

687 Thauer RK. Anaerobic oxidation of methane with sulfate: on the reversibility of the  
688 reactions that are catalyzed by enzymes also involved in methanogenesis from CO<sub>2</sub>.  
689 *Curr Opin Microbiol* 2011;**14**:292–9.

690 Timmers PHA, Gieteling J, Widjaja-Greefkes HCA *et al.* Growth of anaerobic methane-  
691 oxidizing archaea and sulfate-reducing bacteria in a high-pressure membrane  
692 capsule bioreactor. *Appl Environ Microbiol* 2015;**81**:1286–96.

693 Wegener G, Krukenberg V, Riedel D *et al.* Intercellular wiring enables electron transfer  
694 between methanotrophic archaea and bacteria. *Nature* 2015;**526**:587–90.

695 Young ED, Kohl IE, Lollar BS *et al.* The relative abundances of resolved 12 CH<sub>2</sub>D<sub>2</sub>  
696 and 13 CH<sub>3</sub>D and mechanisms controlling isotopic bond ordering in abiotic and  
697 biotic methane gases. *Geochim Cosmochim Acta* 2017;**203**:235–64.

698 Zehnder AJ, Brock TD. Methane formation and methane oxidation by methanogenic  
699 bacteria. *J Bacteriol* 1979;**137**:420–32.

700
